# Supplementary material for: High Resolution ES-DMA quantifies AAV capsid DNA content by electrical mobility to mass correlation
Source: Research Square preprint supplement (doi:10.21203/rs.3.rs-8291101/v1), 2025-12-12
Supplement: Supplementary file 1 [file 093493c45ae068340b0b9b2e.xlsx]

## Sheet: Sheet1
Center		CD-MS (MDa)						DMA (nm)
Peak		A	B	C	D	E	F	A	B	C	D	E	F
Cargo	0	3.7697	3.97	4.2909	5.0434	5.7	5.7	23.3213	23.85	25.6	26.355	27.1	27.1
	1.8	3.7689	3.9557	4.3649	4.6875	5.0491	5.3314	23.3357	23.5	23.8749	24.16	24.951	25.4162
	1.9	3.7851	3.97	4.4979	4.7961	5.146	5.4387	23.3635	23.54	23.979	24.38	25.1294	25.5375
	2.2	3.8008	3.99	4.5689	4.83	5.2837	5.5628	23.2864	23.6	24.0421	24.45	25.3356	26.1617
	2.6	3.7871	4.03	4.6255	4.7917	5.3294	5.7	23.3674	23.7	24.27	24.4261	25.13	25.7
	2.8	3.7975	3.99	4.5018	4.8006	5.1582	5.7	23.3602	23.7	24.0423	24.4898	25.1788	27.1
	2.9	3.7835	4.01	4.9661	5.23	5.5188	5.7	23.3732	23.9646	24.7789	25.3	26.6	26.6
	3.3	3.7867	4.226	4.9804	5.17	5.7	5.7	23.3389	24.0828	24.7998	25.5201	26.1	26.1
	3.6	3.7915	3.99	5.0593	5.3	5.5152	5.7	23.4426	24.0809	24.9915	25.56	26.6	26.6
	4.1	3.7972	4.8047	5.2001	5.6	5.6743	5.7	23.3492	24.4681	25.2205	26.44	26.6	26.6
	4.6	3.97	4.3757	5.0174	5.3516	5.7	5.7	23.5	24.0132	24.7915	25.4654	27.1	27.1
	5	3.7677	4.0203	4.7053	5.4243	5.7	5.7	23.4783	23.9289	24.5433	25.5679	25.965	27.1
Height		CD-MS (A.U.)						DMA (A.U.)
Peak		A	B	C	D	E	F	A	B	C	D	E	F
Cargo	0	0.902	0.0249	0.0038	0.0014	0.0001	0.0001	1.0001	0.0387	0.0172	0	0.0018	0.0018
	1.8	0.15	0.0108	0.8765	0.0152	0.2897	0.0214	0.1052	0.0063	1.0075	0.0741	0.3407	0.0519
	1.9	0.5628	0.0438	0.944	0.0642	0.1528	0.0363	0.4904	0	1.0222	0.1069	0.2542	0.0589
	2.2	0.707	0.0351	1.015	0.0706	0.0815	0.0029	0.3218	0	0.9999	0.1012	0.1032	0.0013
	2.6	0.7456	0.0341	0.6654	0.5116	0.0664	0	0.2231	0.0165	0.7271	0.412	0.0219	0.0063
	2.8	0.9647	0.0412	0.4331	0.4909	0.0889	0.0062	1.0094	0.113	0.6551	0.8291	0.1621	0.0227
	2.9	0.9516	0.0567	0.9389	0.0499	0.0129	0	0.7716	0.0673	0.9919	0.0355	0.0015	0.0015
	3.3	0.6801	0.0483	0.8684	0.0494	0	0	0.4731	0.0656	1.0323	0.1006	0.0003	0.0003
	3.6	0.9547	0.0598	0.943	0.039	0.0136	0.0007	0.6198	0.0552	1.023	0.0447	0.0026	0.0027
	4.1	0.933	0.0489	0.9696	0.0022	0	0	0.5322	0.0576	1.0391	0.0022	0	0
	4.6	0.0177	0.0652	0.0997	0.8889	0.0073	0	0.0629	0.1022	0.1002	1.01	0.0173	0.0188
	5	0.1429	0.1046	0.07	0.9184	0.0178	0.0268	0.1868	0.0786	0.0733	1.0635	0.0418	0.0054
Width		CD-MS (MDa)						DMA (nm)
Peak		A	B	C	D	E	F	A	B	C	D	E	F
Cargo	0	0.0627	0.0753	0.1388	0.234	0.3182	0.3182	0.1774	0.1625	0.0707	0.0709	0.0722	0.0722
	1.8	0.0621	0.0866	0.0707	0.1419	0.0707	0.0707	0.1778	0.0707	0.1265	0.254	0.1447	0.1457
	1.9	0.0606	0.0826	0.1032	0.1055	0.1001	0.0842	0.1809	0.2121	0.1492	0.2136	0.1595	0.1523
	2.2	0.0629	0.1727	0.0932	0.1143	0.0837	0.0707	0.1742	0.0707	0.1768	0.1595	0.2067	0.3182
	2.6	0.0689	0.1502	0.0707	0.1647	0.1718	0.3182	0.1749	0.1948	0.1506	0.2101	0.3182	0.1784
	2.8	0.0596	0.172	0.087	0.0978	0.1396	0.3182	0.174	0.2121	0.1534	0.1938	0.3182	0.3182
	2.9	0.0637	0.2121	0.0804	0.0956	0.0787	0.1094	0.1906	0.2121	0.17	0.2458	0.3182	0.3182
	3.3	0.0652	0.2121	0.0707	0.2828	0.0707	0.0707	0.2053	0.2121	0.1687	0.2222	0.3182	0.3182
	3.6	0.0606	0.2121	0.0796	0.0707	0.0707	0.3182	0.1876	0.2121	0.1748	0.1815	0.3182	0.3182
	4.1	0.0639	0.1197	0.0707	0.1072	0.1367	0.1353	0.1969	0.2121	0.1661	0.2828	0.0707	0.0707
	4.6	0.1975	0.2121	0.2424	0.0707	0.1006	0.0992	0.2248	0.2121	0.297	0.155	0.3182	0.3182
	5	0.0604	0.2063	0.297	0.0707	0.3182	0.0981	0.2338	0.2121	0.297	0.1327	0.1205	0.3182
